# Supplementary material
Source: PubMed Central journal article supplement (PMC3117970)
Supplement: NIHMS286223-supplement-supplement_1.pdf [file NIHMS286223-supplement-supplement_1.pdf]

## **SUPPORTING INFORMATION**

### **Identification of specific inhibitors of human RAD51 recombinase using high-throughput screening**

Fei Huang<sup>1</sup>, Nuzhat A. Motlekar<sup>2</sup>, Chelsea M. Burgwin<sup>1</sup>, Andrew D. Napper<sup>2</sup>, Scott L. Diamond<sup>2,3</sup> and Alexander V. Mazin<sup>1\*</sup>

*<sup>1</sup>Department of Biochemistry and Molecular Biology, Drexel University College of Medicine, Philadelphia, PA 19102, USA; <sup>2</sup>Penn center for Molecular Discovery, University of Pennsylvania, Philadelphia, PA 19102, USA; <sup>3</sup>Department of Genetics, University of Pennsylvania, Philadelphia, PA 19104, USA .*

#### **CONTENT:**

#### **Supplementary Tables 1-3**

\*Corresponding Author:

Alexander Mazin, Ph. D.

Drexel University College of Medicine

Department of Biochemistry and Molecular Biology

245 N 15<sup>th</sup> Street, MS 497, NCB, Room 10103

Philadelphia, PA 19102-1192

Tel: 215-762-7195; Fax: 215-762-4452

E-mail: [amazin@drexelmed.edu](mailto:amazin@drexelmed.edu)

**Supplementary Table 1. The effect of selected compounds (100  $\mu$ M) on the D-loop formation promoted by RAD51**

| Compounds | Joint Molecules (%) | DNA binding <sup>a</sup> |
|-----------|---------------------|--------------------------|
| Control   | 30.3 $\pm$ 1.9      |                          |
| A03       | 5.4 $\pm$ 1.9       |                          |
| A04       | 1.4 $\pm$ 0.1       |                          |
| A05       | 1.6 $\pm$ 0.2       | +                        |
| A06       | 3.5 $\pm$ 0.1       | +                        |
| A07       | 29.6 $\pm$ 0.1      |                          |
| A08       | 10.0 $\pm$ 0.8      |                          |
| A09       | 32.9 $\pm$ 3.5      |                          |
| A10       | 6.7 $\pm$ 2.5       |                          |
| A11       | 10.2 $\pm$ 1.7      |                          |
| A12       | 19.2 $\pm$ 3.4      |                          |
| A13       | 27.8 $\pm$ 3.8      | +                        |
| A14       | 3.8 $\pm$ 0.1       | +                        |
| A15       | 4.2 $\pm$ 0.7       | +                        |
| B01       | 11.0 $\pm$ 2.3      |                          |
| B02       | 6.0 $\pm$ 0.5       |                          |
| B04       | 24.8 $\pm$ 0.1      |                          |
| B05       | 20.1 $\pm$ 0.8      |                          |

<sup>a</sup>DNA binding was determined by the fluorescent intercalator (ethidium bromide) displacement assay.

**Supplementary Table 2. The IC<sub>50</sub> values for selected RAD51 inhibitors**

| Compound | IC <sub>50</sub> (RAD51) (μM) | IC <sub>50</sub> (RecA) (μM) | IC <sub>50</sub> (RecA)/ IC <sub>50</sub> (RAD51) |
|----------|-------------------------------|------------------------------|---------------------------------------------------|
| A03      | 33.2                          | 187.3                        | 5.6                                               |
| A04      | 5.0                           | 5.7                          | 1.1                                               |
| A10      | 26.6                          | 35.3                         | 1.3                                               |
| B02      | 27.4                          | >250                         | n/a                                               |
| B02-3a   | 15.3                          | >100                         | n/a                                               |
| B02-3b   | 27.3                          | >100                         | n/a                                               |

**Supplementary Table 3. Sequences of the oligonucleotides used in this study**

| N                    | Length,<br>nt | Sequence (5'→3')                                                                                       |
|----------------------|---------------|--------------------------------------------------------------------------------------------------------|
| 25                   | 48            | GCAATTAAGCTCTAAGCCATCCGCAAAAATGACCTCTTATCAA<br>AAGGA                                                   |
| 25-FLU <sup>a</sup>  | 47            | FLU-CAATTAAGCTCTAAGCCATCCGCAAAAATGACCTCTTATC<br>AAAAGGA                                                |
| 26-BHQ1 <sup>b</sup> | 47            | TCCTT TTGATAAGAGGTCATTTTTGCGGATGGCTTAGAGC<br>TTAATTG-BHQ1                                              |
| 374                  | 48            | G TTCAGTCAGTGCTCGATATGCGGTGTGAATTACGGCTCAGTTG<br>CCTA                                                  |
| 90                   | 90            | CGGGTGTCTGGGGCTGGCTTAACTATGCGGCATCAGAGCAGATTGT<br>ACTGAGAGTGCACCATATGCGGTGTGAAATACCGCACAGATGCGT        |
| 71                   | 94            | CTTTAGCTGCATATTTACAACATGTTGACCTACAGCACCAGATTC<br>AGCAATTAAGCTCTAAGCCATCCGCAAAAATGACCTCTTATCAAA<br>AGGA |
| 169                  | 94            | TCCTTTTGATAAGAGGTCATTTTTGCGGATGGCTTAGAGCTTAATT<br>GCTGAATCTGGTGCTGTTTTTTTTTTTTTTTTTTTTTTTTTTTTTTT      |
| 170                  | 94            | TCCTTTTGATAAGAGGTCATTTTTGCGGATGGCTTAGAGCTTAATT<br>GCTAAATCTGGTGCTGTAGGTCAACATGTTGTAAATATGCAGCTA<br>AAG |
| 171                  | 63            | ACAGCACCAGATTTAGCAATTAAGCTCTAAGCCATCCGCAAAAAT<br>GACCTCTTATCAAAAGGA                                    |

<sup>a</sup>FLU = Fluorescein

<sup>b</sup>BHQ1 = Black Hole Quencher 1
